# Supplementary material for: One-Pot Mechanochemical Synthesis of Carbons with High Microporosity and Ordered Mesopores for CO2 Uptake at Ambient Conditions
Source: MDPI journal article supplement (doi:10.3390/nano13152262), 2023-08-07
Supplement: s1 [file s1]

## One-pot mechanochemical synthesis of high microporosity and ordered mesoporous carbons for CO<sub>2</sub> uptake at ambient conditions

Rabindra Dubadi, Mietek Jaroniec\*

<sup>1</sup>Department of Chemistry and Biochemistry, Kent State University, Kent, OH, 44242, USA

\*Correspondence: [jaroniec@kent.edu](mailto:jaroniec@kent.edu)

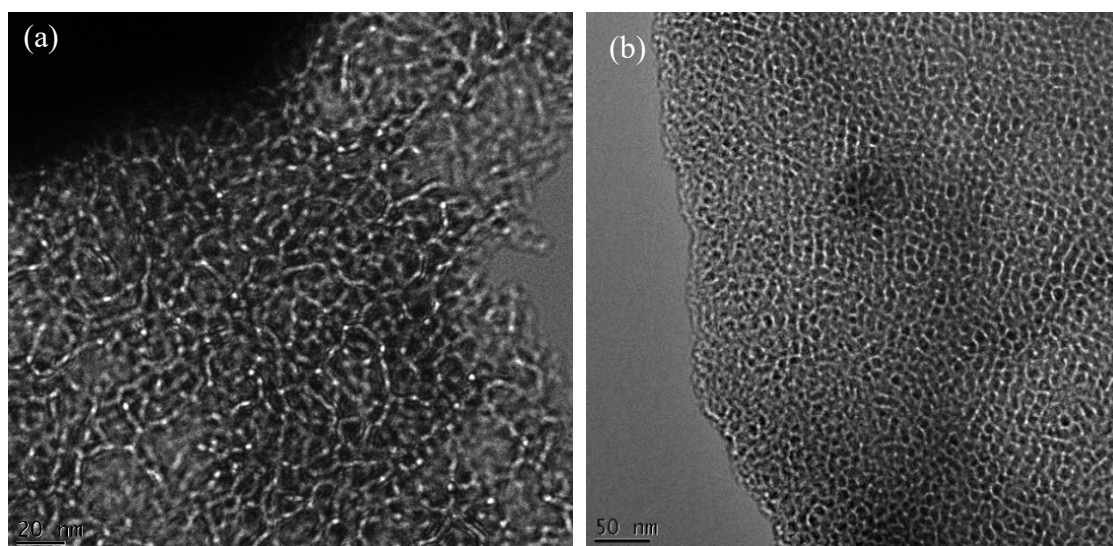

**Figure S1.** TEM images of TPG-1 at different magnifications 20 nm (a), and 50 nm (b).

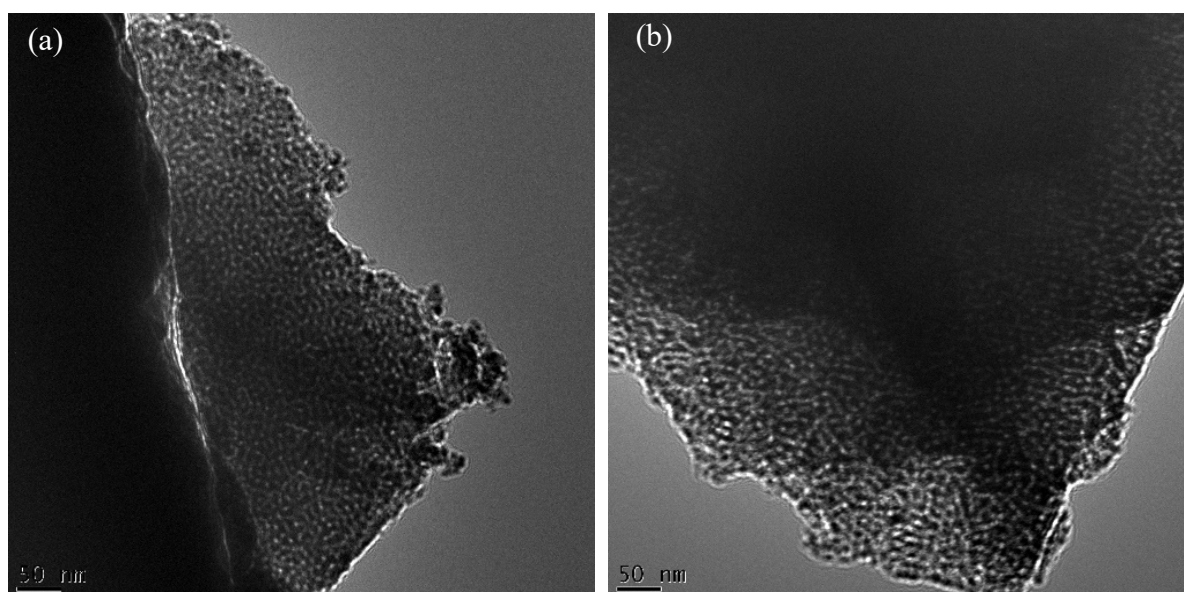

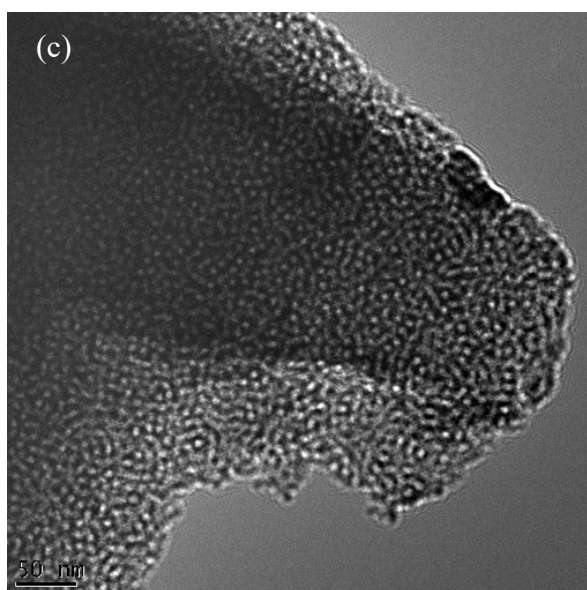

**Figure S2.** TEM images of TFG-0.5 (a), TFG-1.25 (b), and TFG-1.5 (c).

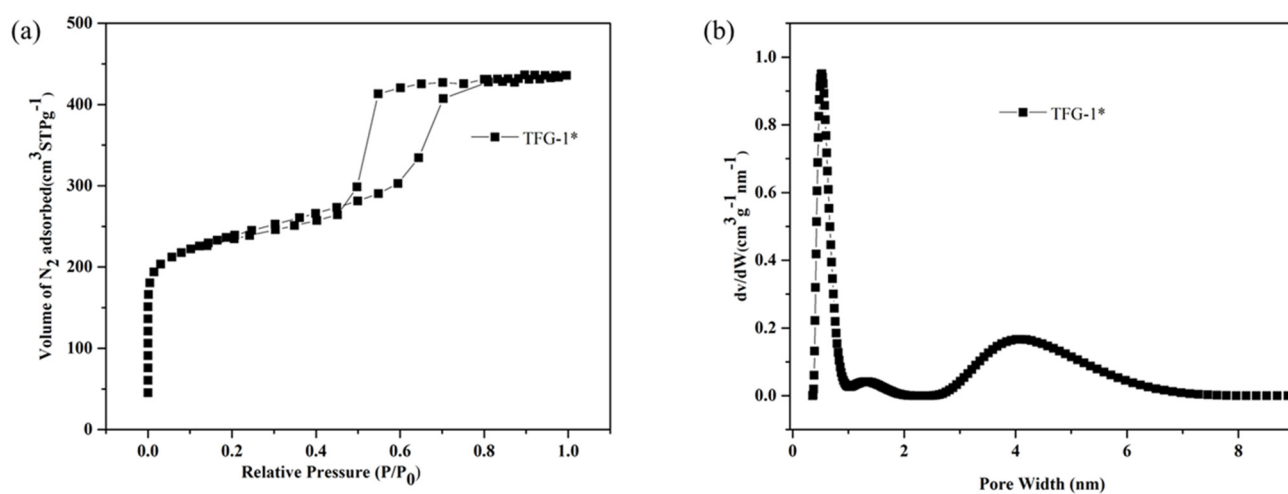

**Figure S3.**  $N_2$  adsorption isotherm for TFG-1\* (a) with the corresponding pore size distribution (b); \* refers to the second batch of TFG-1 sample.

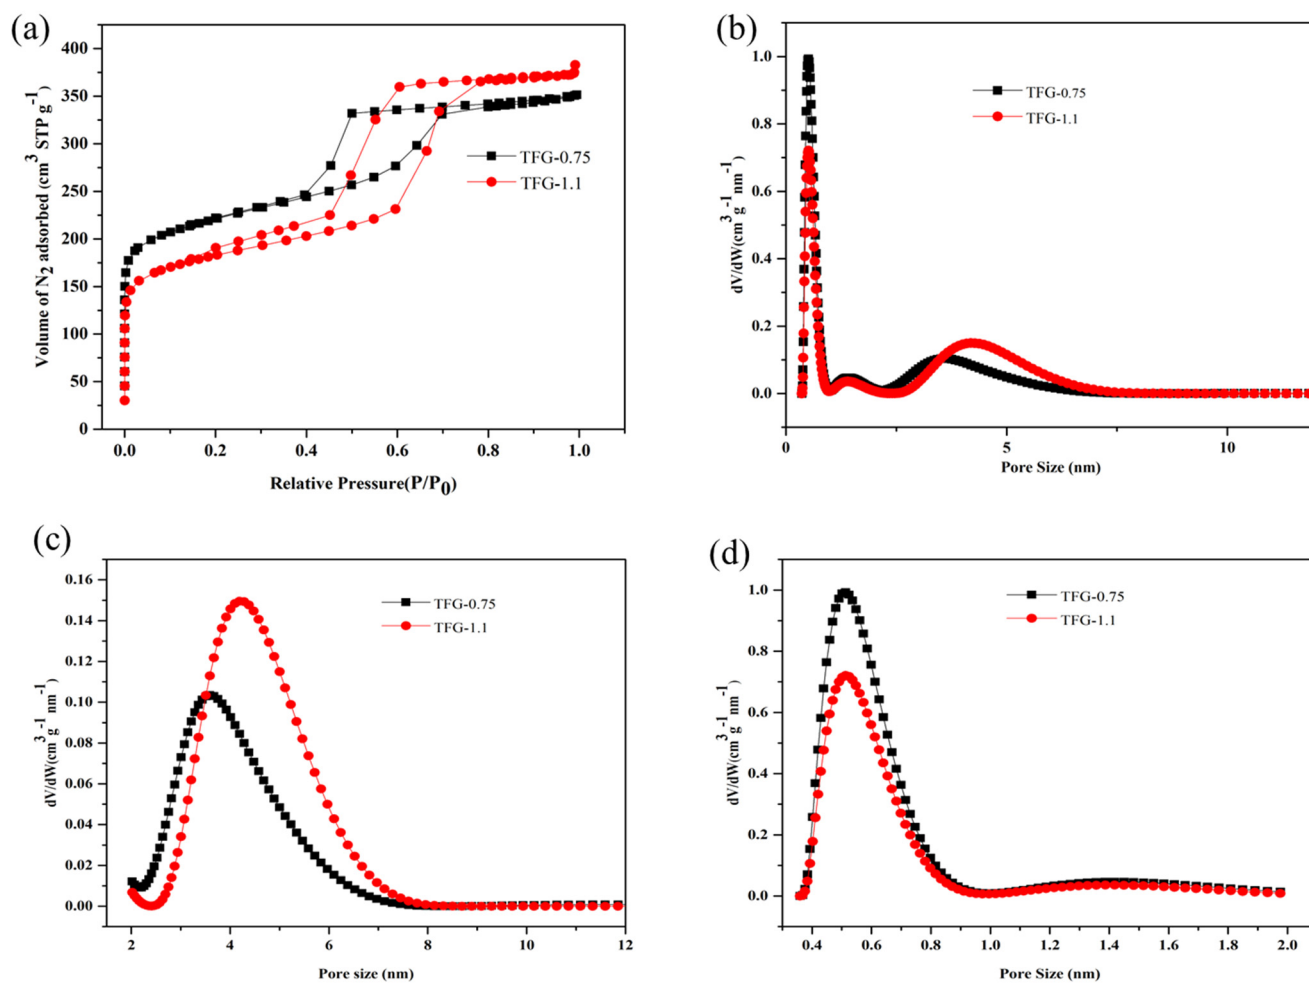

**Figure S4.** N<sub>2</sub> adsorption isotherms for TFG carbon samples with tannin/polymer ratio of 0.75, and 1.1 (a), and the corresponding pore size distributions in the entire range of pores (b), mesopore range (c), and micropore range (d).

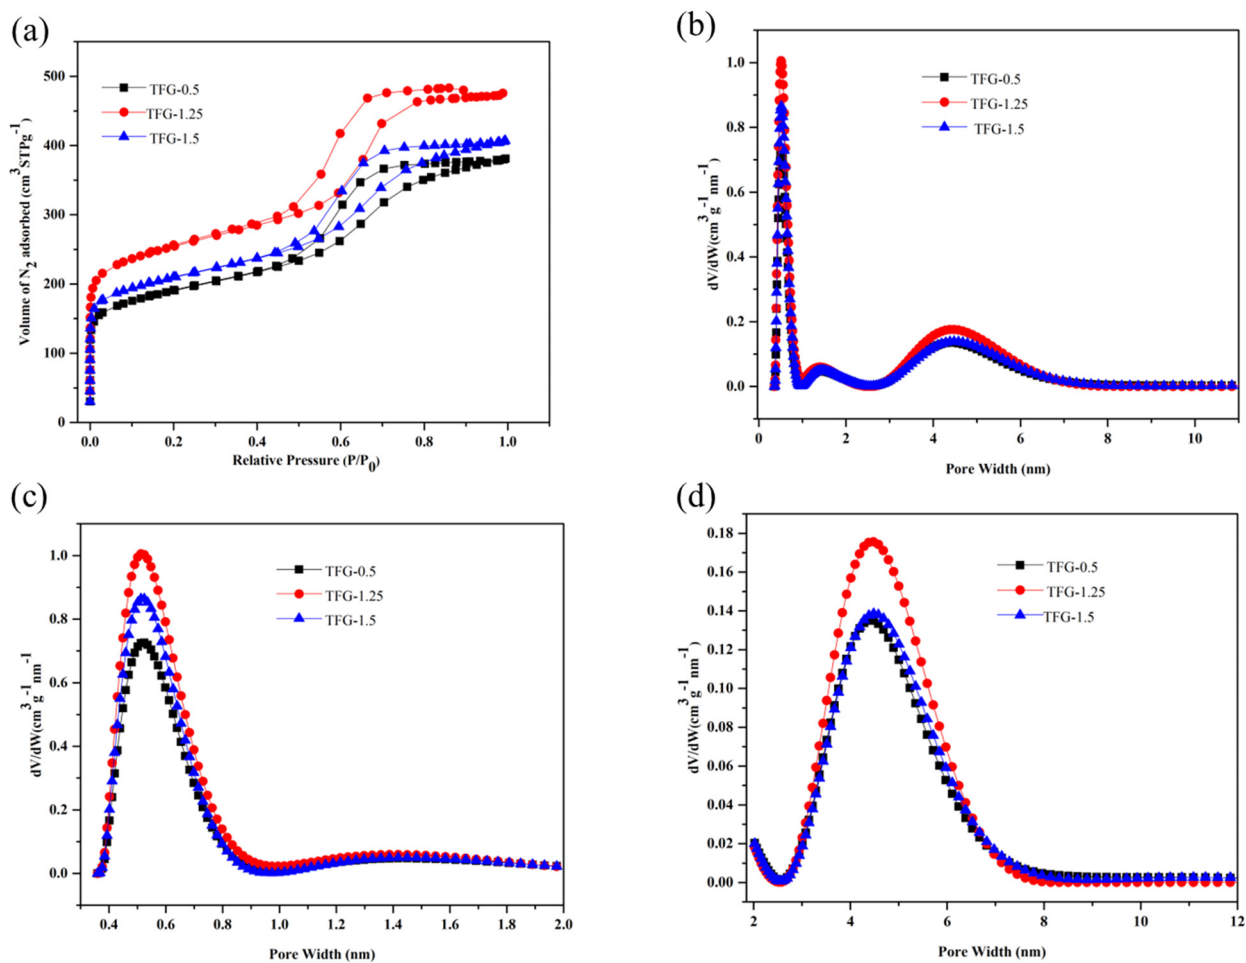

**Figure S5.** N<sub>2</sub> adsorption isotherms for TFG carbon samples with tannin/polymer ratio of 0.5, 1.25, and 1.5 (a), and the corresponding pore size distributions in the entire range of pores (b), micropore range (c), and mesopore range (d).

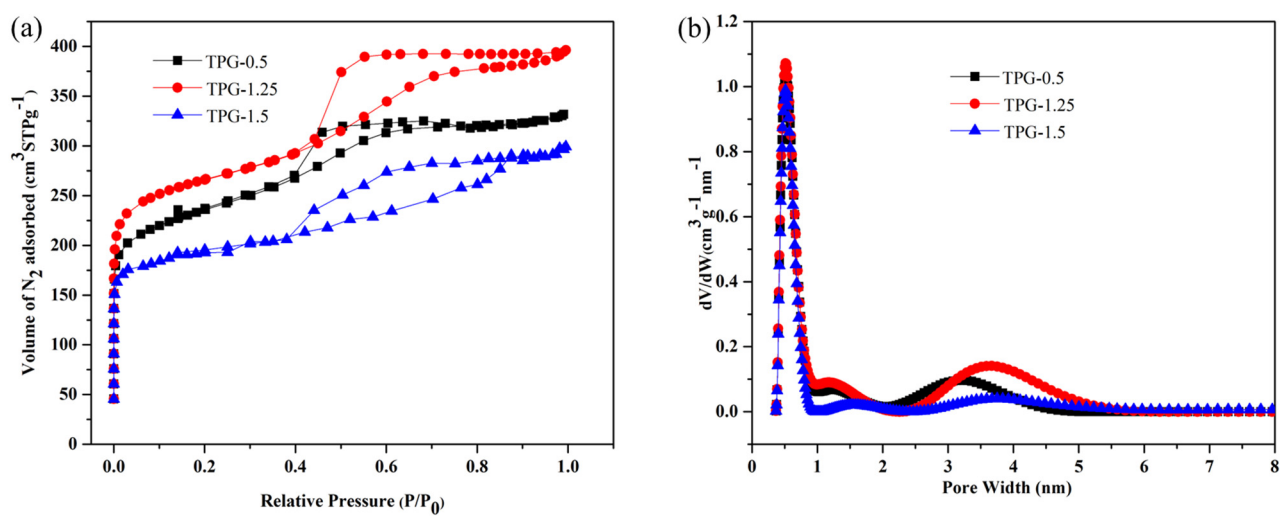

**Figure S6.** N<sub>2</sub> adsorption isotherms for TPG carbon samples with tannin/polymer ratio of 0.5, 1.25, and 1.5 (a), and the corresponding pore size distributions in the entire range of pores.

**Table S1:** The textural properties for the reference carbon samples.

| Samples                           | V <sub>Total</sub><br>(cm <sup>3</sup> g <sup>-1</sup> ) | V<0.7nm<br>(cm <sup>3</sup> g <sup>-1</sup> ) | V<1nm<br>(cm <sup>3</sup> g <sup>-1</sup> ) | V<2nm<br>(cm <sup>3</sup> g <sup>-1</sup> ) | V <sub>me</sub><br>(cm <sup>3</sup> g <sup>-1</sup> ) | Micropore<br>width at<br>PSD (max),<br>w(nm) | S <sub>BET</sub><br>(m <sup>2</sup> g <sup>-1</sup> ) | n <sub>CO2</sub> (25 °C)<br>(mmolg <sup>-1</sup> ) |
|-----------------------------------|----------------------------------------------------------|-----------------------------------------------|---------------------------------------------|---------------------------------------------|-------------------------------------------------------|----------------------------------------------|-------------------------------------------------------|----------------------------------------------------|
| TFG-1N                            | 0.41                                                     | 0.09                                          | 0.11                                        | 0.14                                        | 0.28                                                  | 0.52                                         | 460                                                   | -                                                  |
| TFG-1N <sub>2</sub> A             | 0.55                                                     | 0.16                                          | 0.18                                        | 0.20                                        | 0.35                                                  | 0.51                                         | 647                                                   | 2.17                                               |
| TFG-1*<br>(2 <sup>nd</sup> batch) | 0.67                                                     | 0.21                                          | 0.25                                        | 0.28                                        | 0.39                                                  | 0.54                                         | 837                                                   | -                                                  |
| TPG-1N                            | 0.38                                                     | 0.07                                          | 0.09                                        | 0.13                                        | 0.25                                                  | 0.51                                         | 423                                                   | 2.17                                               |
| TF-1                              | 0.40                                                     | 0.14                                          | 0.16                                        | 0.18                                        | 0.22                                                  | 0.75                                         | 472                                                   | -                                                  |
| TP-1                              | 0.46                                                     | 0.20                                          | 0.23                                        | 0.26                                        | 0.20                                                  | 0.77                                         | 640                                                   | -                                                  |
| T                                 | 0.96                                                     | 0.04                                          | 0.10                                        | 0.14                                        | 0.82                                                  | 2.03                                         | 450                                                   | -                                                  |

Note: TFG-X and TPG-X refer to the carbon samples prepared by using Mimosa tannin with Pluronic F127 and P123, respectively, along with glyoxal as a cross linking agent. N refers to the sample carbonized in nitrogen without CO<sub>2</sub> activation, and N<sub>2</sub>A refers to the sample carbonized in N<sub>2</sub> followed by CO<sub>2</sub> activation; - data not available for CO<sub>2</sub> capture; S<sub>BET</sub> - specific surface area calculated using the BET equation for adsorption data in the relative pressure range of 0.05–0.20; Single point pore volume obtained from the volume adsorbed at 0.98 P/P<sub>0</sub>; Pore diameter at the maximum of PSD in the micropore region was obtained by NLDFT method; n<sub>CO2</sub> – amount of CO<sub>2</sub> adsorbed at 1.03 bar.
